# Supplementary material
Source: Springer Nature journal article supplement (https://www.springermedizin.de/resource/supplementary/13045_2008_34_MOESM2_ESM.pdf/9660616)
Supplement: MOESM2 [file 9660616]

|        |        |               |        |               |              |              |          |
|--------|--------|---------------|--------|---------------|--------------|--------------|----------|
| POS    | POS    | NEG           | NEG    | Blank         | Eotaxin      | FAS ligand   | bFGF     |
| POS    | POS    | NEG           | NEG    | Blank         | Eotaxin      | FAS ligand   | bFGF     |
| G-CSF  | GM-CSF | IFN- $\gamma$ | IGF-II | IL1- $\alpha$ | IL1- $\beta$ | IL12-p40/p70 | IL12-p70 |
| G-CSF  | GM-CSF | IFN- $\gamma$ | IGF-II | IL1- $\alpha$ | IL1- $\beta$ | IL12-p40/p70 | IL12-p70 |
| IL13   | IL6    | IL9           | Leptin | MCP-1         | M-CSF        | MIG          | PF4      |
| IL13   | IL6    | IL9           | Leptin | MCP-1         | M-CSF        | MIG          | PF4      |
| TIMP-1 | TIMP-2 | TNF- $\alpha$ | TPO    | VEGF          | Blank        | Blank        | POS      |
| TIMP-1 | TIMP-2 | TNF- $\alpha$ | TPO    | VEGF          | Blank        | Blank        | POS      |

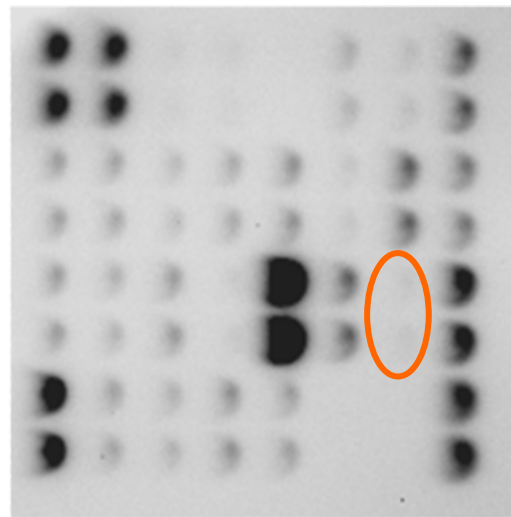

LLC1 tumor from  
Egr-1<sup>+/+</sup> mouse

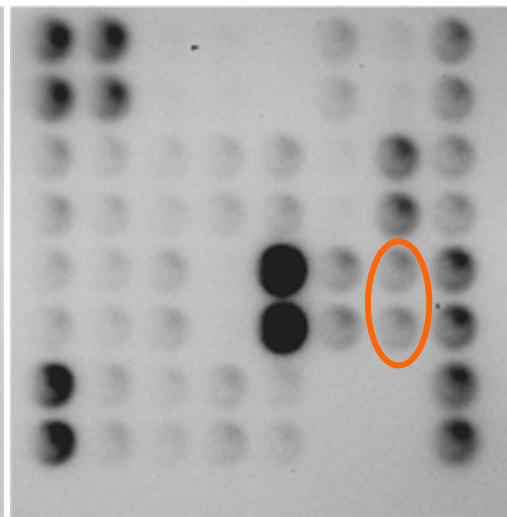

LLC1 tumor from  
Egr-1<sup>-/-</sup> mouse

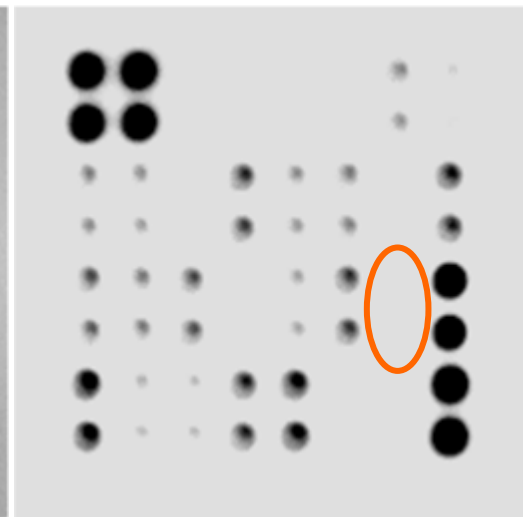

B16F10 tumor from  
Egr-1<sup>+/+</sup> mouse

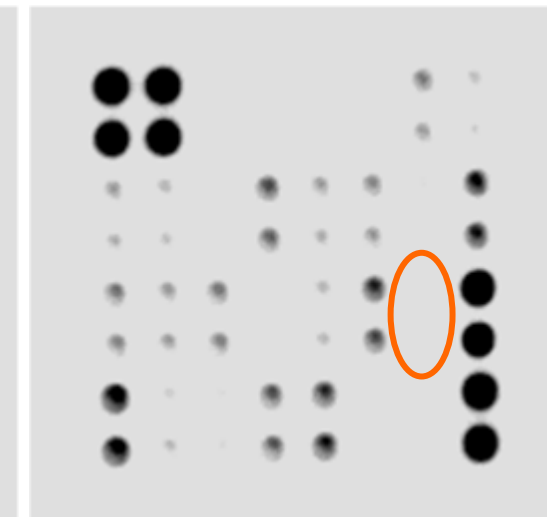

B16F10 tumor from  
Egr-1<sup>-/-</sup> mouse
